# Supplementary material for: NiCo layered double hydroxide nanocages for high-performance asymmetric supercapacitors
Source: Royal Society of Chemistry journal article supplement (doi:10.1039/d2qi02763a), 2023-01-01
Supplement: d2qi02763a1.pdf [file d2qi02763a1.pdf]

**Supplementary Information**

**NiCo Layered Double Hydroxide Nanocages for High  
Performance Asymmetric Supercapacitors**

Hualin Jiang,<sup>a, b</sup> Qi Ke,<sup>a, b</sup> Xianhua Qiu,<sup>a, b</sup> Jiezeng Chen,<sup>a, b</sup> Pinghua Chen,<sup>\*a, b</sup> Shuai  
Wang,<sup>a, b</sup> Xubiao Luo,<sup>a, b, c</sup> Bingying Rao,<sup>b</sup>

*a. Key Laboratory of Jiangxi Province for Persistent Pollutants Control and Resources  
Recycle, Nanchang 330063, PR China. E-mail: cph1979@126.com*

*b. Department of Environmental and Chemical Engineering, Nanchang Hangkong  
University, Nanchang 330063, PR China.*

*c. School of Life Sciences, Jingtangshan University, Jian 343009, PR China*

## **1.General Information**

### **1.1.Materials**

Polytetrafluoroethylene (PTFE), polyvinylpyrrolidone (PVP, K30), L-ascorbic acid, activated carbon (AC), graphitized carbon black, and  $\text{NiCl}_2 \cdot 6\text{H}_2\text{O}$  were manufactured by Shanghai Macklin Biochemical Co., Ltd.  $\text{CoCl}_2 \cdot 6\text{H}_2\text{O}$ ,  $\text{Na}_2\text{S}_2\text{O}_3$  and absolute ethanol were purchased from Xilong Chemical Co., Ltd.  $\text{CuCl}_2 \cdot 2\text{H}_2\text{O}$  was provided by Aladdin Chemical Co., Ltd. Nickel foam (denoted NF, the thickness and purity of NF were 1 mm and 99.9%, respectively) was purchased from Shenzhen Kejing Co. Ltd. No reagents were purified further. Deionized (DI) water was applied in all tests.

### **1.2.Material characterization**

The structure and morphologies of the samples were studied by XRD (Cu  $K\alpha$ ,  $\lambda=0.154$  nm, Bruker D8 Advance), SEM (FEI Nova Nano SEM450), and TEM (TEM, Talos F200X). The surface chemical bonding states were analyzed by XPS (Thermo ESCALAB 250XI). The specific surface area and porous structure of the samples were studied via the BET method (BELSORP Max). The nickel and cobalt molar ratio of the samples were studied by ICP-MS(ICP-MS:Aglient 7850). In situ investigations were conducted in an electrochemical three-electrode cell. The NiCo-LDH-1 electrode, silver/silver chloride and Pt plate electrode were applied as the working, reference and counter electrodes, respectively, in an electrochemical cell with 1 mol/L KOH. In situ XRD characterizations of NiCo-LDH-1 were tested at CV (0~0.45 V vs. Ag/AgCl; scanning rate: 0.6  $\text{mV} \cdot \text{s}^{-1}$ ). The change in the crystal structure in the  $2\theta$  region ( $5^\circ - 80^\circ$ ) during the charge–discharge process was investigated.

## **2.Experimental section**

### **2.1.Preparation of $\text{Cu}_2\text{O}$ nanocubes**

In brief,  $\text{CuCl}_2 \cdot 2\text{H}_2\text{O}$  (0.17 g) was dissolved into 100 mL DI water under ambient conditions to produce a transparent light blue solution. After heating to  $55^\circ\text{C}$ ,  $2 \text{ mol} \cdot \text{L}^{-1}$  NaOH (10 mL) was slowly added to the light blue solution and stirred for 30 min. Then,  $0.6 \text{ mol} \cdot \text{L}^{-1}$  L-ascorbic acid (10 mL) was added to the solution. After stirring for 3 h, a red precipitate was obtained. Subsequently, solid products ( $\text{Cu}_2\text{O}$  nanocubes) were obtained by centrifugation, alternately washed with DI water and absolute alcohol, and dried at  $60^\circ\text{C}$ .

## **2.2.Preparation of hollow NiCo-LDH nanocages**

Based on the principle of Pearson hard and soft acid-base (HSAB), hollow cubic structures were prepared.<sup>22</sup> In a typical process, 120 mg  $\text{Cu}_2\text{O}$  powder was dispersed in 240 mL mixed solvent (1:1) containing water and ethanol. After 30 min of ultrasound, 3.6 g polyvinylpyrrolidone (PVP, K30) was added. After stirring for 30 min,  $\text{NiCl}_2 \cdot 6\text{H}_2\text{O}$  and  $\text{CoCl}_2 \cdot 6\text{H}_2\text{O}$  with molar ratios of 1:2, 1:1, and 2:1 were added to the solution. Then, 100 mL of  $\text{Na}_2\text{S}_2\text{O}_3$  solution ( $1 \text{ mol} \cdot \text{L}^{-1}$ ) was added dropwise into the suspension at a 30 rpm/min rate through a peristaltic pump and stirred for 3 h until the red color of the suspension turned green. Subsequently, the powders were assembled by centrifugation, washed with DI water and absolute alcohol, and dried at  $60^\circ\text{C}$  for 12 h. The obtained solids were denoted NiCo-LDH-0.5, NiCo-LDH-1 and NiCo-LDH-2 according to the feeding molar ratios of Ni: Co.

## **2.3.Synthesis of $\text{Ni}(\text{OH})_2$ and $\text{Co}(\text{OH})_2$ nanocages**

Similarly, using the protocol described in section of preparation of hollow NiCo-LDH nanocages,  $\text{Ni}(\text{OH})_2$  nanocages were prepared without the addition of  $\text{CoCl}_2 \cdot 6\text{H}_2\text{O}$  and  $\text{Co}(\text{OH})_2$  nanocages were prepared without the addition of  $\text{NiCl}_2 \cdot 6\text{H}_2\text{O}$ .

## **2.4.Preparation of common NiCo-LDH**

The common NiCo-LDH was prepared without the addition of a  $\text{Cu}_2\text{O}$  nanocube template.  $\text{NiCl}_2 \cdot 6\text{H}_2\text{O}$  and  $\text{CoCl}_2 \cdot 6\text{H}_2\text{O}$  with a molar ratio of 1:1 were dissolved in DI water (140 mL). Then,  $1 \text{ mol} \cdot \text{L}^{-1}$  NaOH solution (100 mL) was added dropwise into the mixture via a peristaltic pump. The reaction was then stirred for 3 h. After centrifugation and washing with DI water and absolute alcohol, the collected products were dried at  $60^\circ\text{C}$  for 12 h. The resulting material was named NiCo-LDH-C.

## **2.5.Electrochemical characterization**

The as-prepared NiCo layered double hydroxide was placed into a polyethylene plastic tube. Then, a mixture of 5 mg/mL carbon black, polytetrafluoroethylene (PTFE) and absolute ethanol solution (the mass ratio was 8:1:1) was mixed to obtain a suspension that was uniformly dispersed onto the surface of a nickel foam (NF) (the loading area and amount were  $1 \times 1 \text{ cm}^2$  and 2 mg, respectively) and dried at  $60^\circ\text{C}$  for 12 h and finally pressed into thin slices under a pressure of 10 MPa to obtain NiCo layered double hydroxide electrodes. Similarly, activated carbon electrodes were prepared by

activated carbon and polytetrafluoroethylene (PTFE) (the mass ratio was 8:2).

The two-electrode testing system (NiCo-LDH-1 and activated carbon electrodes were applied as positive and negative electrodes, respectively) was tested in 1 mol·L<sup>-1</sup> KOH. Testing GCD (galvanostatic charge-discharge), CV (cyclic voltammetry), EIS (electrochemical impedance spectroscopy), and so on, were conducted by a CHI 660E electrochemical workstation. The frequency range of EIS was 0.01~100000 Hz, and the electrolytes were Fe<sup>2+</sup>/Fe<sup>3+</sup> (0.25 mmol·L<sup>-1</sup>, 0.25 mmol·L<sup>-1</sup>) and Na<sub>2</sub>SO<sub>4</sub> (0.5 mol·L<sup>-1</sup>).

The mass of activated carbon to be loaded on the cathode can be calculated from the mass of NiCo layered double hydroxide loaded on the anode based on the following formula:<sup>1</sup>

$$\frac{m^+}{m^-} = \frac{C^- * \Delta V^-}{C^+ * \Delta V^+} \quad (1)$$

where m<sup>+</sup>/m<sup>-</sup>(g), C<sup>+</sup>/C<sup>-</sup>(F·g<sup>-1</sup>), and ΔV<sup>+</sup>/ΔV<sup>-</sup> (V) are the mass, capacitance values and voltage windows of the positive/negative materials, respectively.

The mass ratio capacitance (C<sub>g</sub>, F·g<sup>-1</sup>), energy density (E, Wh·kg<sup>-1</sup>) and power density (P, W·kg<sup>-1</sup>) can be expressed by the following formulas:<sup>2</sup>

$$C_g = \frac{I * \Delta t}{m * \Delta V} \quad (2)$$

$$E = \int \frac{I * \Delta V}{3.6m} dt \quad (3)$$

$$P = \frac{E}{\Delta t} \quad (4)$$

where t(s) is the discharging time. I(A) is the current during the charging and discharging process. m(g) is the weight of the active material. ΔV(V) is the potential window of the electrode.

**Table S1** Weight ratios and atomic ratios of NiCo-LDH-1 Hollow Nanocages measured by EDX.

| Element | Atomic (%) | Weight (%) |
|---------|------------|------------|
| Ni      | 20.87      | 36.52      |
| Co      | 20.12      | 35.34      |
| O       | 59.01      | 28.14      |

**Table S2** Comparison of NiCo-LDH-1//AC with similar supercapacitor devices.

| Supercapacitor device                                                                           | Energy density (Wh·kg <sup>-1</sup> ) | Power density (W·kg <sup>-1</sup> ) | Voltage (V) | Ref.             |
|-------------------------------------------------------------------------------------------------|---------------------------------------|-------------------------------------|-------------|------------------|
| HKUST-1@CoNi-LDH//AC                                                                            | 39.8                                  | 799.9                               | 1.6         | [3]              |
| Ni <sub>2</sub> P/NiGa <sub>2</sub> O <sub>4</sub> /NiGa-LDH//Co <sub>3</sub> O <sub>4</sub> -C | 72                                    | 800                                 | 1.6         | [4]              |
| Co-NiMn-LDH@V <sub>2</sub> C//V <sub>2</sub> C                                                  | 30                                    | 700                                 | 1.4         | [5]              |
| NiMn-LDH@CuO//AC                                                                                | 10.8                                  | 100                                 | 1           | [6]              |
| CoAlNi-LDH-NR//AC                                                                               | 50.3                                  | 800                                 | 1.6         | [7]              |
| CoSx/Ni-Co LDH//AC                                                                              | 35.8                                  | 800                                 | 1.6         | [8]              |
| NiAl-LDH-OA-2//AC                                                                               | 40.26                                 | 943                                 | 1.6         | [9]              |
| NiCoP@NiCo-LDH//AC                                                                              | 57                                    | 850                                 | 1.7         | [10]             |
| CCCH@NiCo-LDH@Au-CuO/Cu//VN                                                                     | 34.97                                 | 1053                                | 1.6         | [11]             |
| NiCo <sub>2</sub> Al-LDH//CC@ZPC                                                                | 44                                    | 462                                 | 1.5         | [12]             |
| NiFe-LDH/NiOOH//MoS <sub>2</sub> /rGO                                                           | 48.1                                  | 432.9                               | 1.7         | [13]             |
| NiAl-LDH/rGO//AC                                                                                | 15.42                                 | 230                                 | 1.6         | [14]             |
| <b>NiCo-LDH-1//AC</b>                                                                           | <b>59.0</b>                           | <b>935.7</b>                        | <b>1.6</b>  | <b>This work</b> |

## Reference

- 1 K. Lu, B. Song, K. Li, J.T. Zhang, H.Y. Ma, Cobalt hexacyanoferrate nanoparticles and MoO<sub>3</sub> thin films grown on carbon fiber cloth for efficient flexible hybrid supercapacitor, *J. Power Sources*, 2017, 370, 98-105.
- 2 Y.M. Shi, P.H. Chen, J.Z. Chen, D.Z. Chen, H.Y. Shu, H.L. Jiang, X.B. Luo, Hollow prussian blue analogue/g-C<sub>3</sub>N<sub>4</sub> nanobox for all-solid-state asymmetric supercapacitor, *Chem. Eng. J.*, 2021, 404, 126284.
- 3 Y.N. Zhang, J.L. Chen, C.Y. Su, K.Y. Chen, H.B. Zhang, Y.H. Yang, W.H. Huang, Enhanced ionic diffusion interface in hierarchical metal-organic framework@layered double hydroxide for high-performance hybrid supercapacitors, *Nano Res.*, 2022, <https://doi.org/10.1007/s12274-022-4545-6>.
- 4 C.Y. Li, X. Li, H.Q. Wang, P.W. Huo, Y. Yan, X.K. Wang, Selective phosphidation of NiGa-Layered double hydroxide for hybrid supercapacitors, *Chem. Eng. J.*, 2021, 420, 129784.
- 5 Y.M. Zhang, J.M. Cao, J.Z. Li, Z.Y. Yuan, D.D. Li, L.L. Wang, W. Han, Self-assembled Cobalt-doped NiMn-layered double hydroxide (LDH)/V<sub>2</sub>C<sub>7</sub>x MXene hybrids for advanced aqueous electrochemical energy storage properties, *Chem. Eng. J.*, 2022, 430, 132992.
- 6 A.T. Zhang, W. Zheng, Z. Yuan, J.M. Tian, L.J. Yue, R.K. Zheng, D. Wei, J.Q. Liu, Hierarchical NiMn-layered double hydroxides@CuO core-shell heterostructure in-situ generated on Cu(OH)<sub>2</sub> nanorod arrays for high performance supercapacitors, *Chem. Eng. J.*, 2020, 380, 122486.
- 7 H. Chen, H. Zhang, Y. Zhang, Y. Wang, X.T. Su, L.J. Zhang, Z. Lin, General strategy toward hexagonal ring-like layered double hydroxides and their application for asymmetric supercapacitors, *Chem. Eng. J.*, 2019, 375, 121926.
- 8 X.H. Guan, M.H. Huang, L. Yang, G.S. Wang, X. Guan, Facial design and synthesis of CoS<sub>x</sub>/Ni-Co LDH nanocages with rhombic dodecahedral structure for high-performance asymmetric supercapacitors, *Chem. Eng. J.*, 2019, 372, 151-162.
- 9 H. Zhang, M.U. Tahirb, X.L. Yan, X.M. Liu, X.T. Su, L.J. Zhang, Ni-Al layered double hydroxide with regulated interlayer spacing as electrode for aqueous asymmetric supercapacitor, *Chem. Eng. J.*, 2019, 368, 905-913.
- 10 X.Y. Gao, Y.F. Zhao, K.Q. Dai, J.T. Wang, B. Zhang, X.J. Shen, NiCoP nanowire@NiCo-layered double hydroxides nanosheet heterostructure for flexible asymmetric supercapacitors, *Chem. Eng. J.*, 2020, 384, 123373.
- 11 Y.Q. Guo, X.F. Hong, Y. Wang, Q. Li, J.S. Meng, R.T. Dai, X. Liu, L. He, L.Q. Mai, Multicomponent Hierarchical Cu-Doped NiCo-LDH/CuO Double Arrays for Ultralong-Life Hybrid Fiber Supercapacitor, *Adv. Funct. Mater.*, 2019, 29, 1809004.
- 12 X.R. Gao, X.M. Liu, D.J. Wu, B. Qian, Z.K. Kou, Z.H. Pan, Y.J. Pang, L.Q. Miao, J. Wang, Significant Role of Al in Ternary Layered Double Hydroxides for Enhancing Electrochemical Performance of Flexible Asymmetric Supercapacitor, *Adv. Funct. Mater.*, 2019, 29, 1903879.
- 13 P.F. Zhang, X.Y. Deng, W. Li, Z.Z. Ma, X.G. Wang, Electrochemical-induced surface reconstruction to NiFe-LDHs-based heterostructure as novel positive electrode for supercapacitors with enhanced performance in neutral electrolyte, *Chem. Eng. J.*, 2022, 449, 137886.
- 14 X. Ge, C.D. Gu, Z.Y. Yin, X.L. Wang, J.P. Tu, J. Li, Periodic stacking of 2D charged sheets: Self-assembled superlattice of Ni-Al layered double hydroxide (LDH) and reduced graphene oxide, *Nano Energy*, 2016, 20, 185-193.
